# Supplementary material
Source: PubMed Central journal article supplement (PMC3931517)
Supplement: NIHMS542706-supplement-Supplemental_Digital_Content.pdf [file NIHMS542706-supplement-Supplemental_Digital_Content.pdf]

## **Appendix. Stillbirth Collaborative Research Network**

University of Texas Health Science Center at San Antonio: Donald J. Dudley, Deborah Conway, Karen Aufdemorte, Angela Rodriguez, Monica Pina;

University of Utah School of Medicine: Robert M. Silver, Michael W. Varner, Kristi Nelson; Center for Human Toxicology: Diana Wilkins.

Emory University School of Medicine and the Rollins School of Public Health: Carol J. Rowland Hogue, Barbara J. Stoll, Janice Daniels Tinsley, Bahig Shehata, Carlos Abramowsky;

Brown University: Donald Coustan, Halit Pinar, Marshall Carpenter, Susan Kubaska;

University of Texas Medical Branch at Galveston: George R. Saade, Radek Bukowski, Jennifer Lee Rollins, Hal Hawkins, Elena Sbrana;

RTI International: Corette B. Parker, Matthew A. Koch, Vanessa R. Thorsten, Holly Franklin, Pinliang Chen;

Pregnancy and Perinatology Branch, *Eunice Kennedy Shriver* National Institute of Child Health and Human Development, National Institutes of Health: Marian Willinger, Uma M. Reddy;

Columbia University: Robert L. Goldenberg.

Varner MW, Silver RM, Rowland Hogue CJ, Willinger M, Parker CB, Thorsten VR. Association between stillbirth and illicit drug use and smoking during pregnancy. *Obstet Gynecol* 2013;123.

The authors provided this information as a supplement to their article.
